# Supplementary material
Source: Elsevier journal article supplement (https://comptes-rendus.academie-sciences.fr/chimie/article/10.1016/j.crci.2010.04.001/file/attach/mmc1.pdf)

# Valorization of by-products of sugar industry : New nanostructured hybrid materials containing sugar derived structures

Damien Hérault<sup>1</sup>, Fabiano Rodembusch<sup>1</sup>, Leandra Campo<sup>1</sup>, Marc Gingras<sup>2</sup>, Geneviève Cerveau<sup>1</sup> and Robert J. P. Corriu<sup>1\*</sup>

<sup>1</sup>Institut Charles Gerhardt Montpellier, UMR5253, CNRS-UM2-ENSCM-UM1, CMOS, Place E. Bataillon, F-34095 Montpellier, France.

<sup>2</sup>CNRS, Aix-Marseille University, CINAM UPR 3118, 163 av Luminy, Case 913, F-13288 Marseille Cedex 09, France

**MX** solid state <sup>13</sup>C NMR spectrum

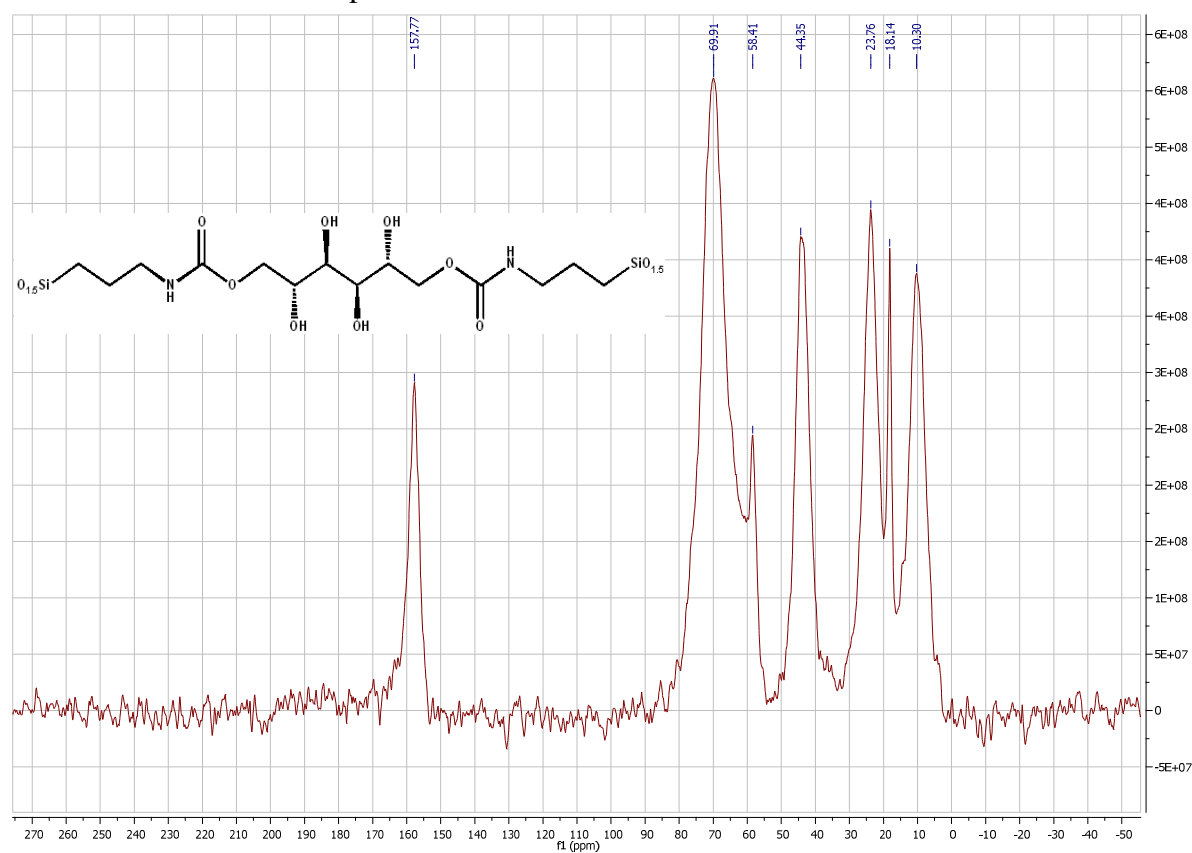

### MX solid state $^{29}\text{Si}$ NMR spectrum

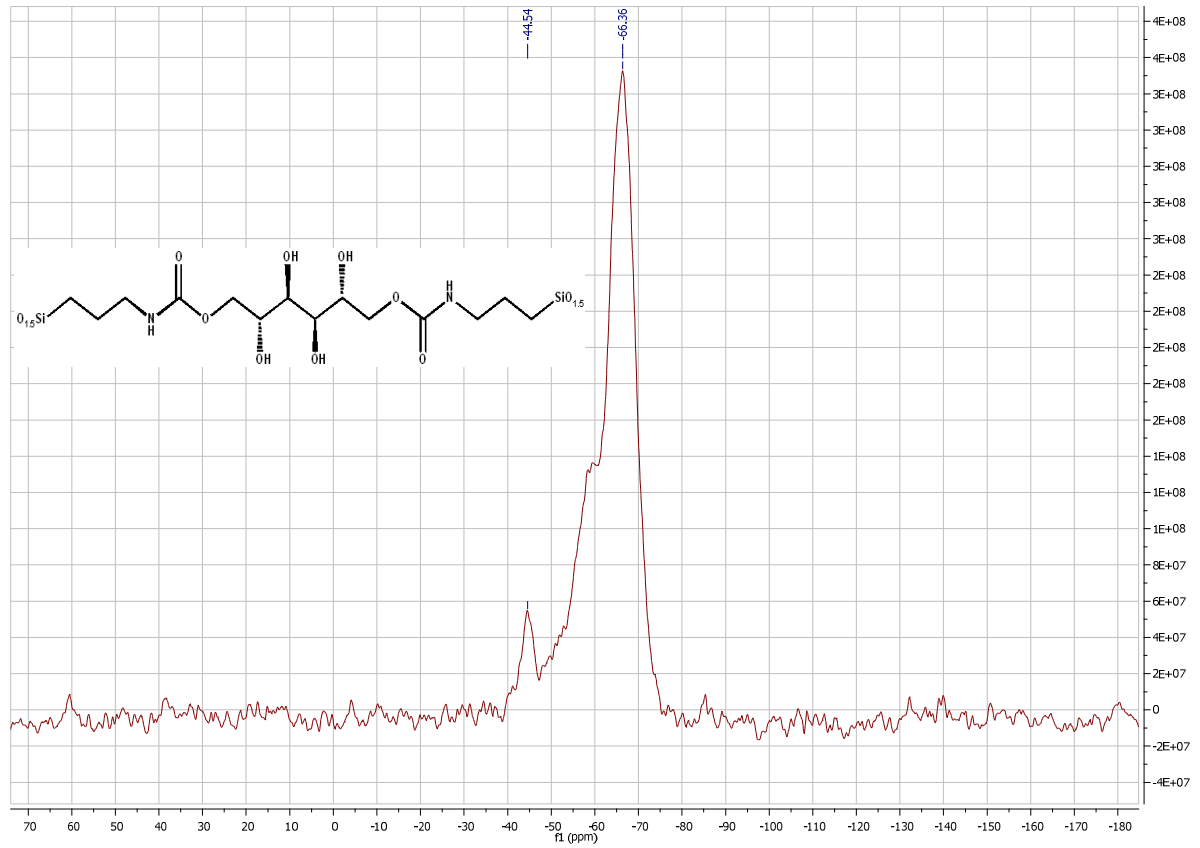

### MX FTIR spectrum

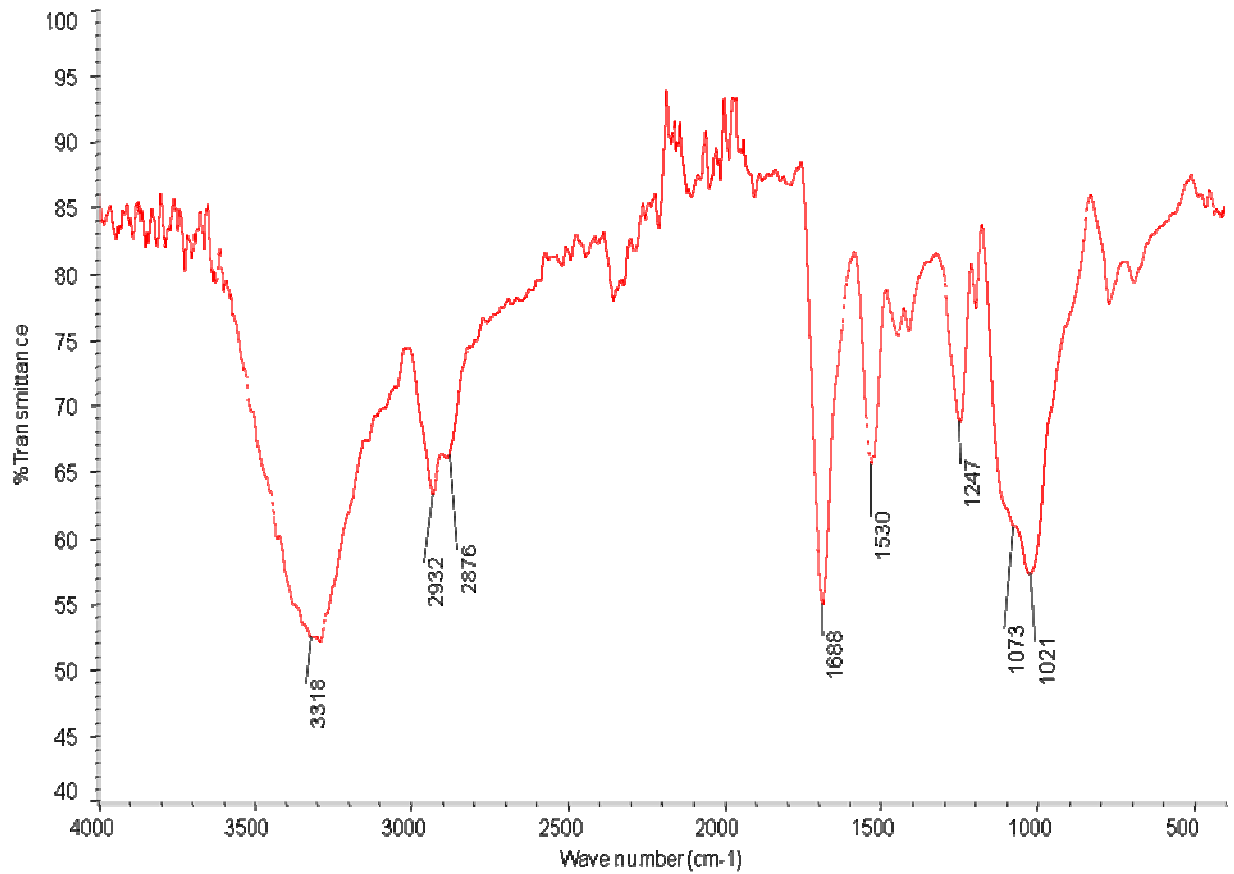

### SX solid state $^{13}\text{C}$ NMR spectrum

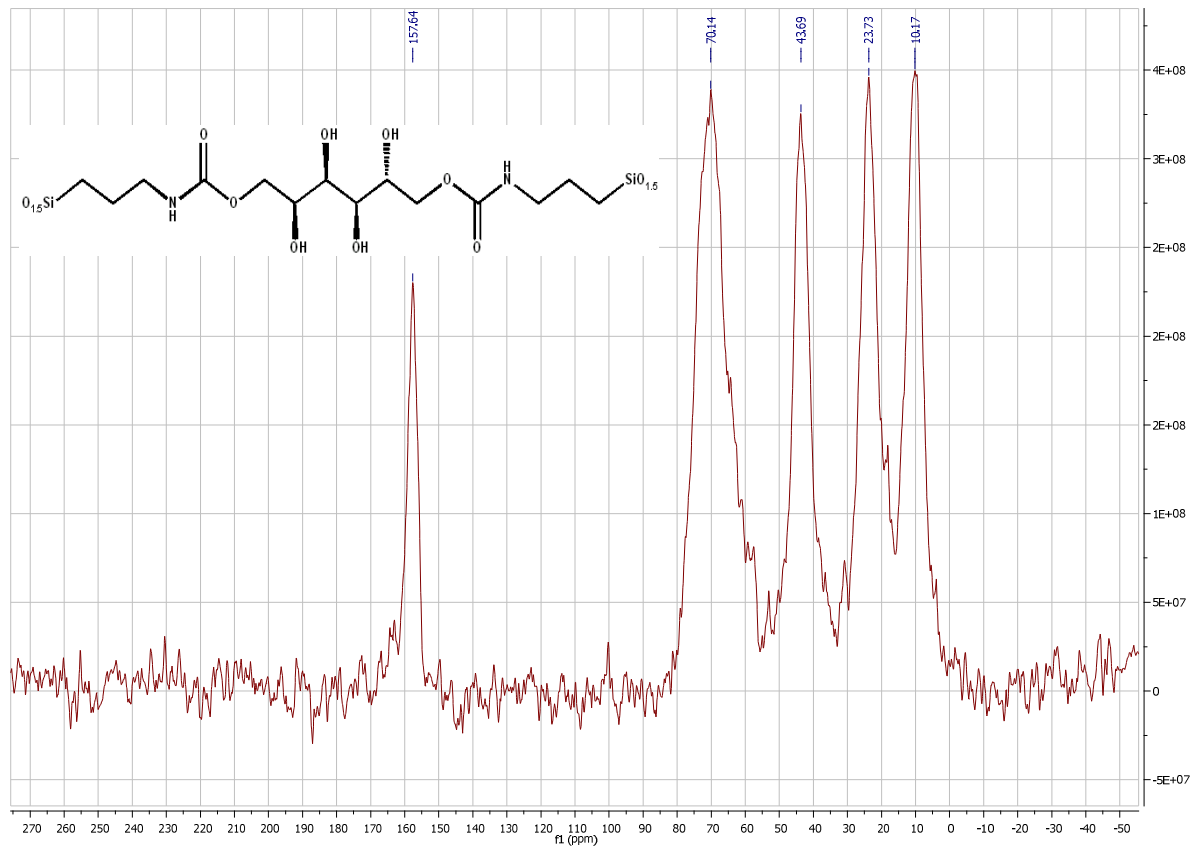

### SX solid state $^{29}\text{Si}$ NMR spectrum

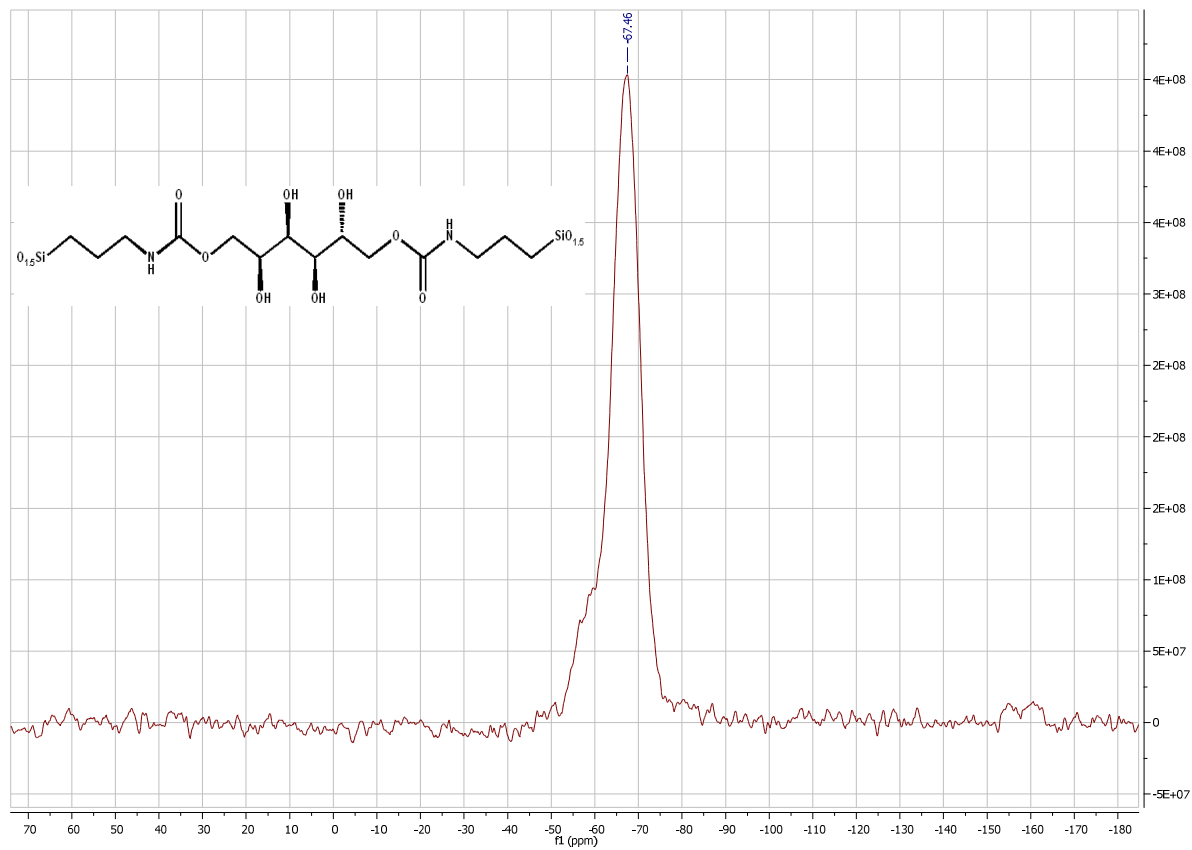

### SX FTIR spectrum

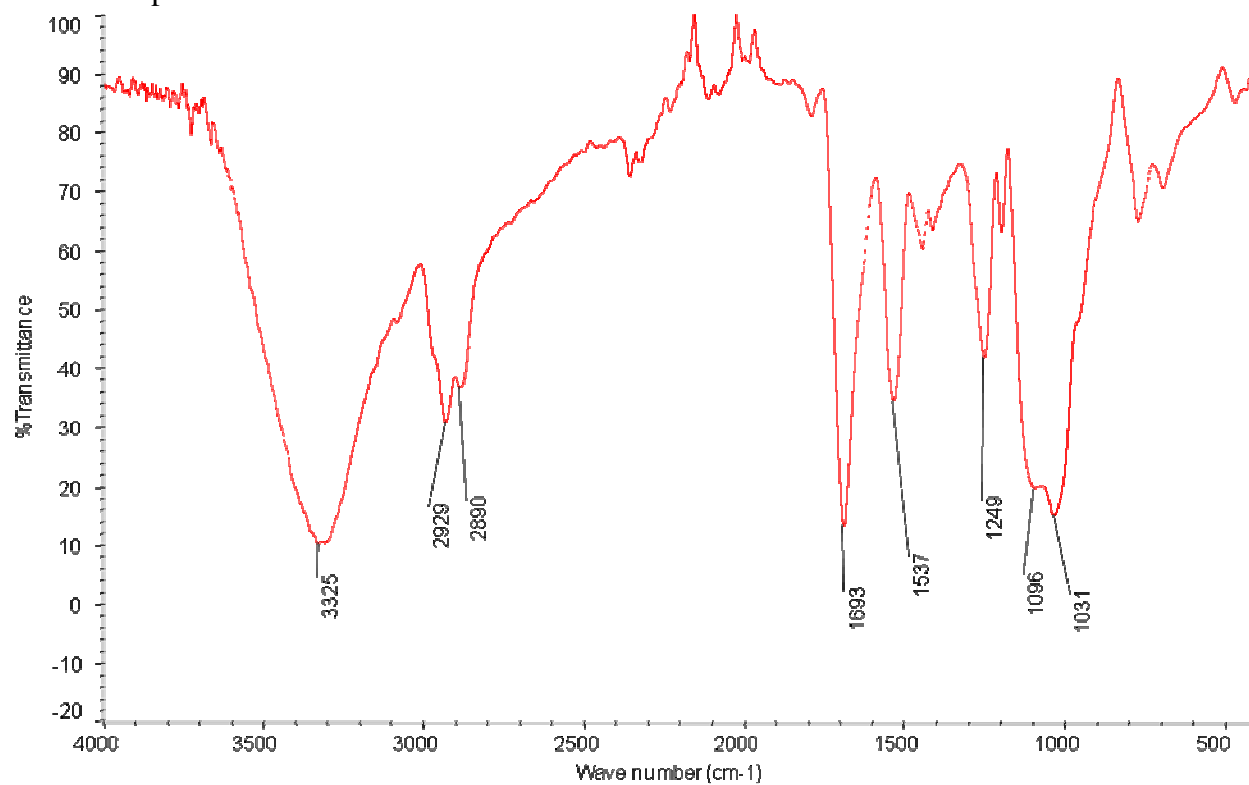

### DX solid state <sup>13</sup>C NMR spectrum

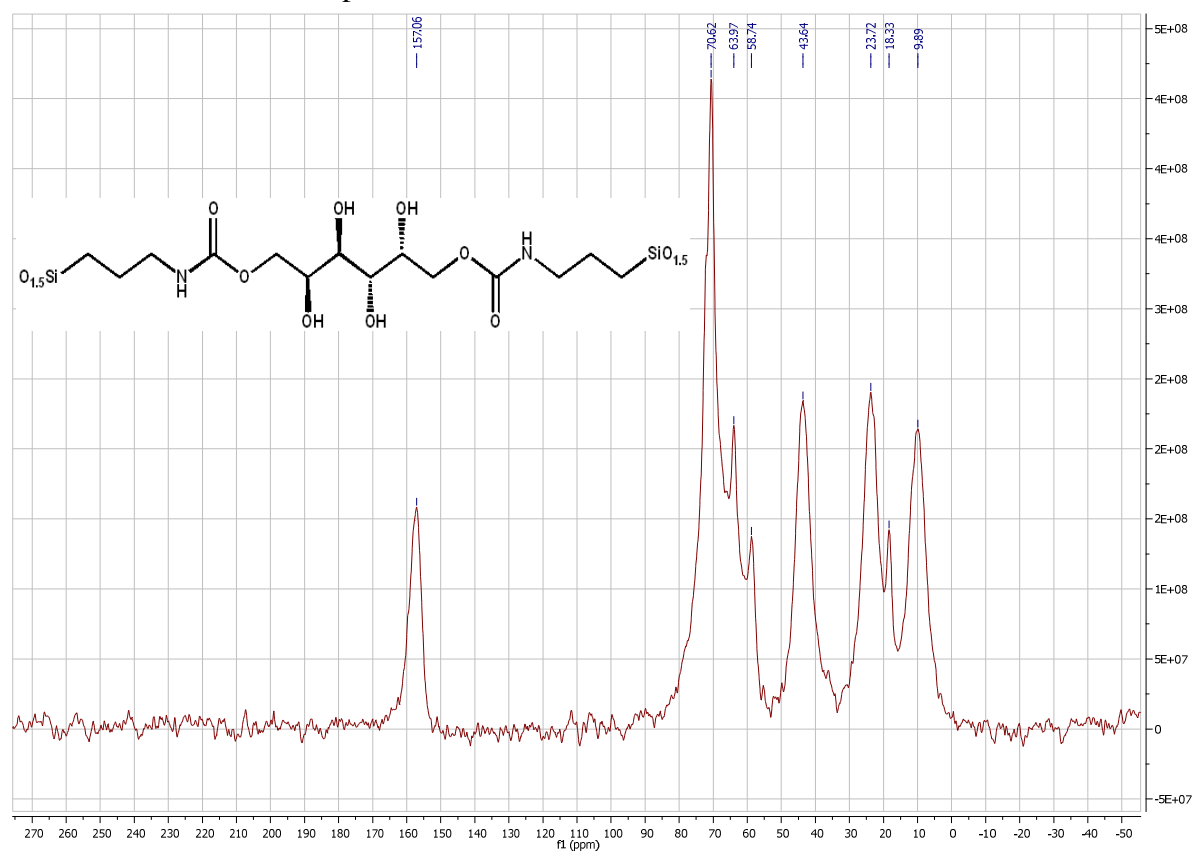

### DX solid state <sup>29</sup>Si NMR spectrum

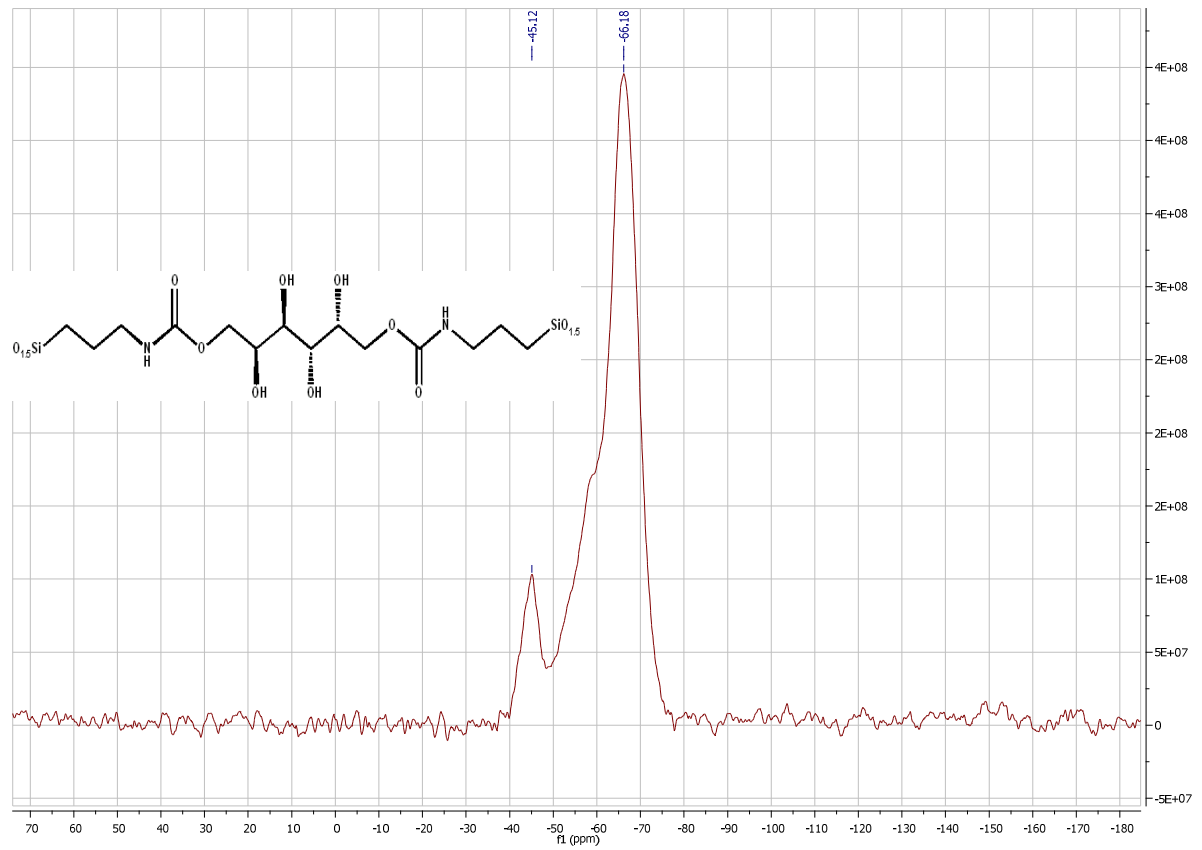

### DX FTIR spectrum

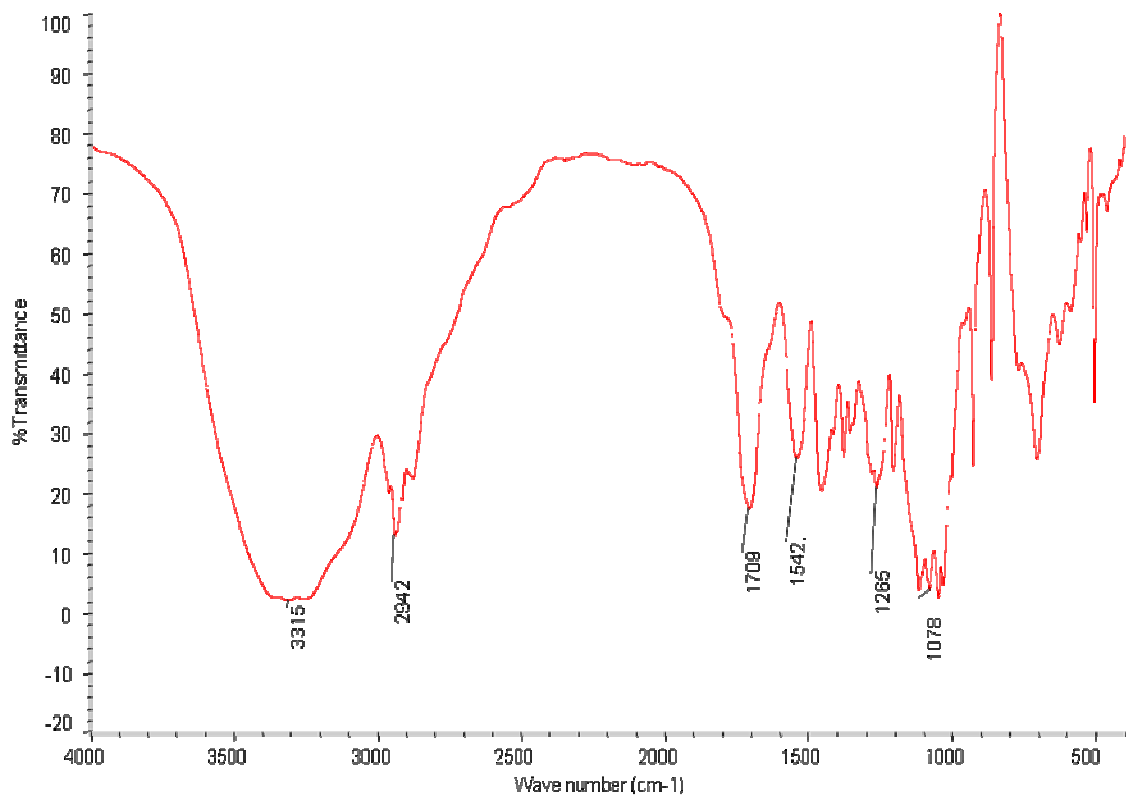

### M' solid state $^{13}\text{C}$ NMR spectrum

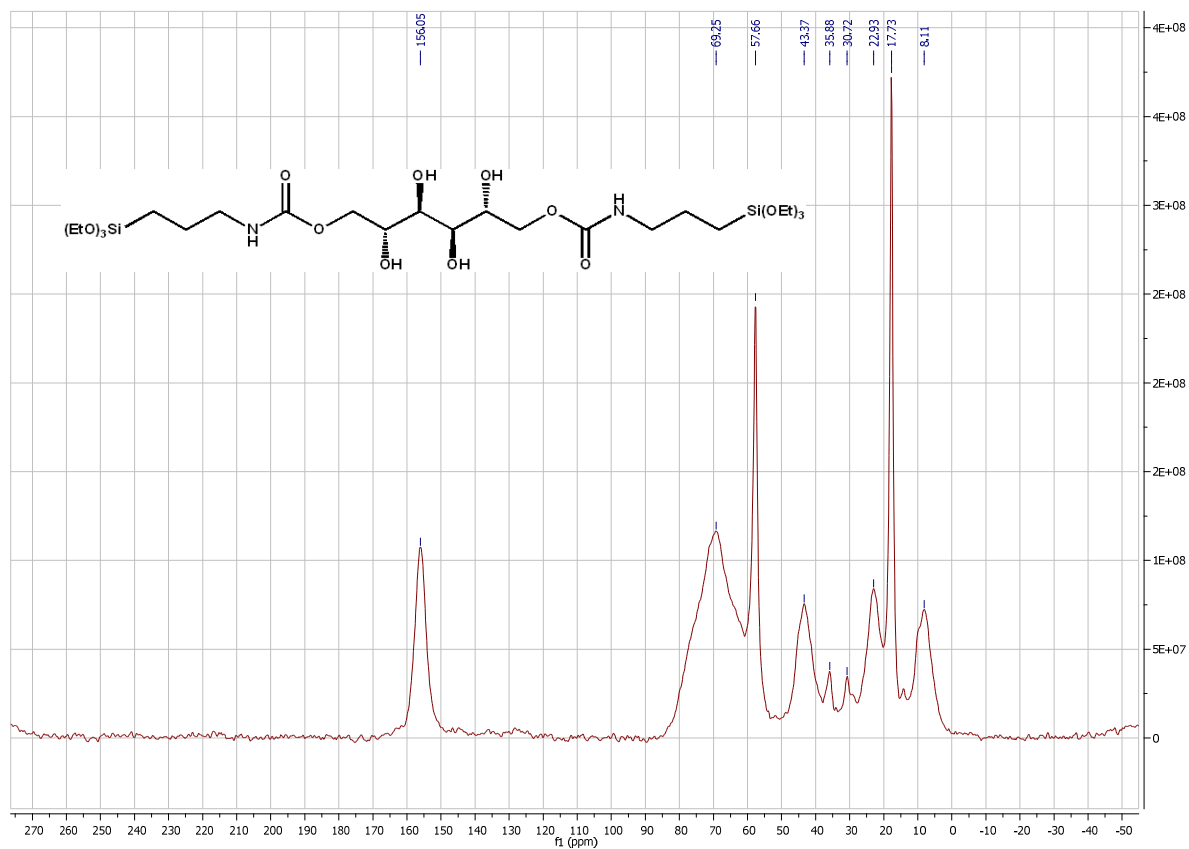

### M' solid state $^{29}\text{Si}$ NMR spectrum

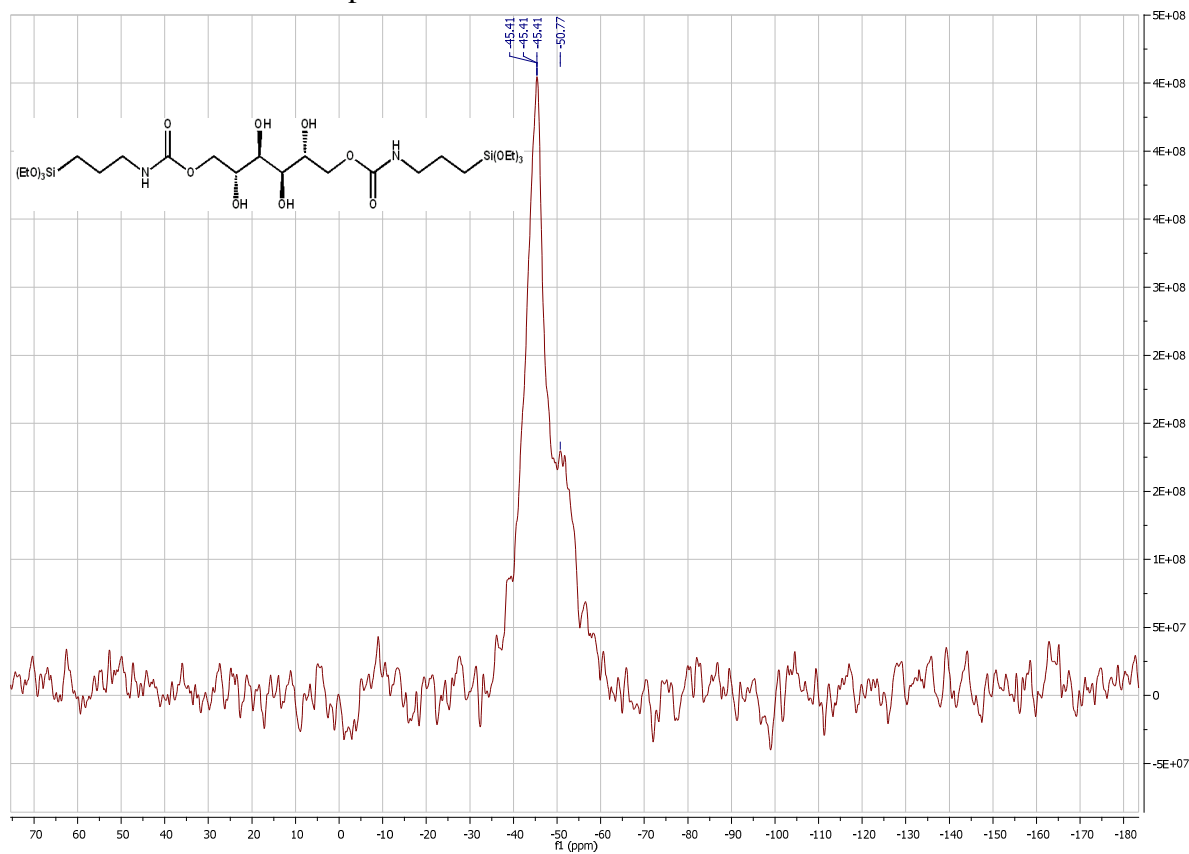

### M' FTIR spectrum

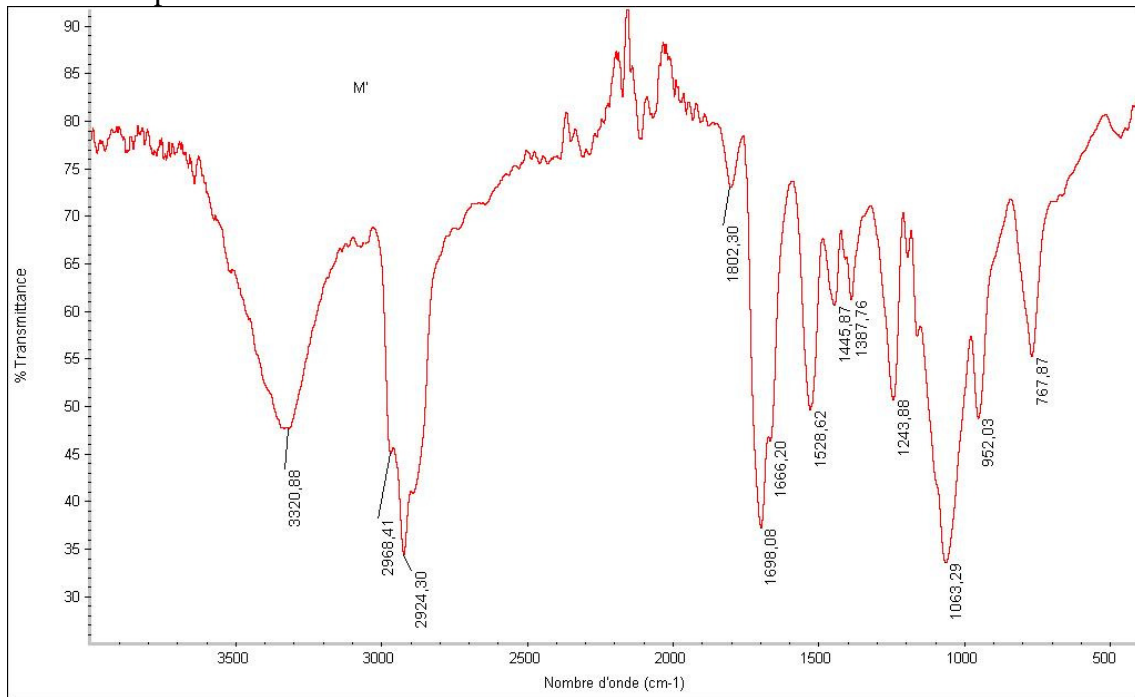

### Transmission electronic microscopy corresponding to the table 1

Entry 1

Entry 2

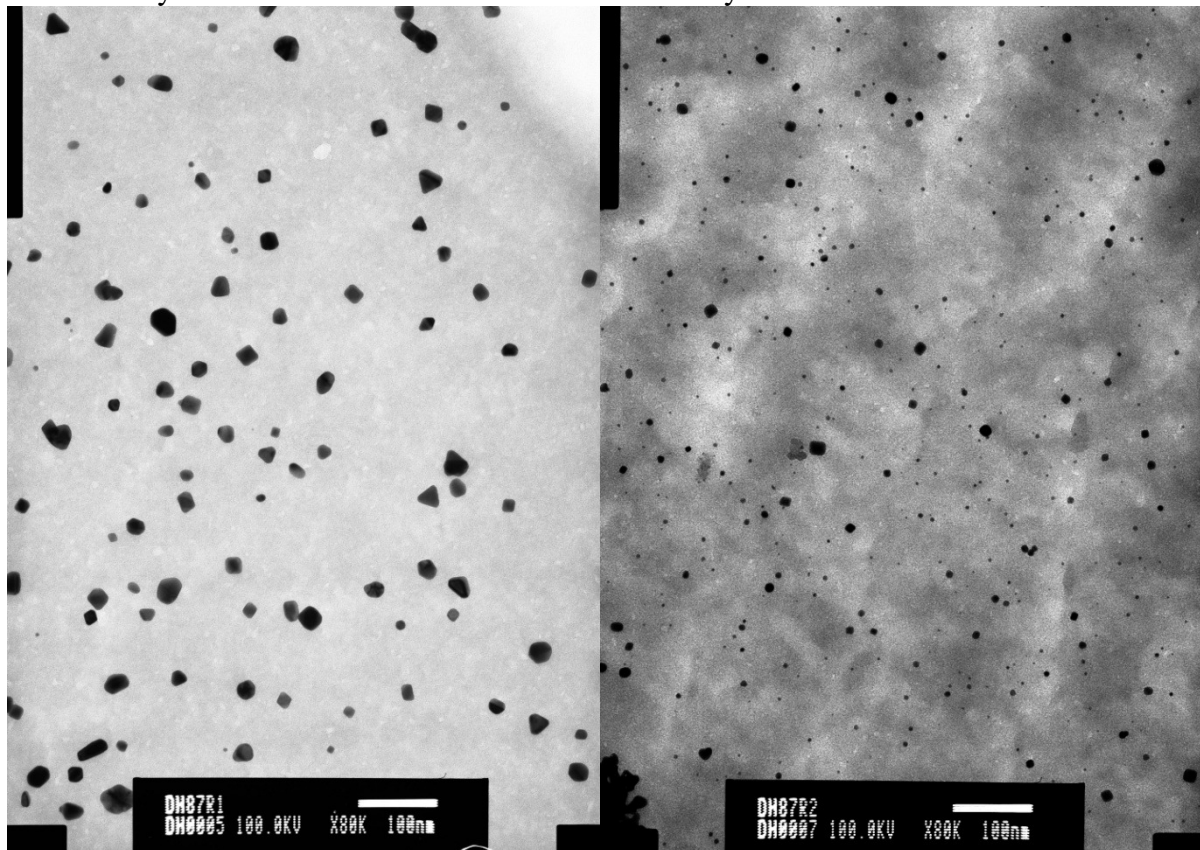

Entry 3

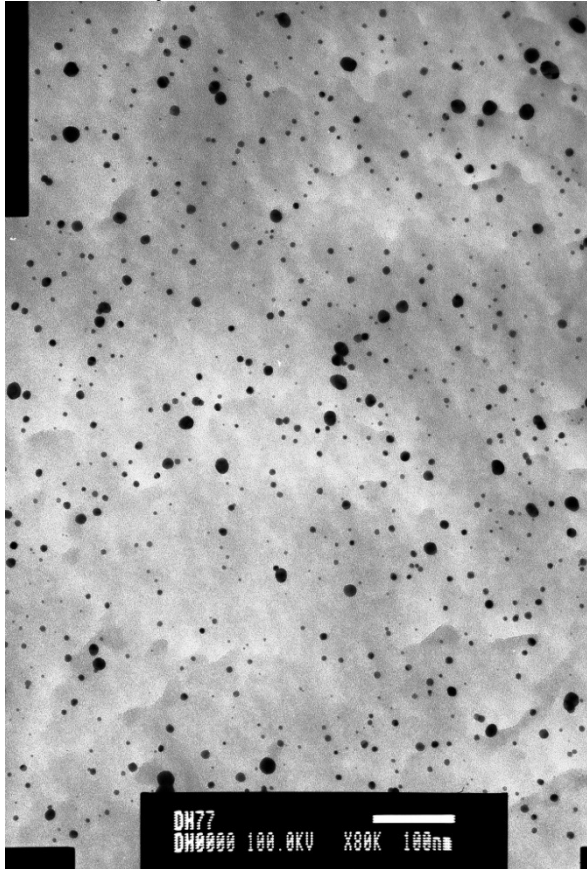

Entry 4

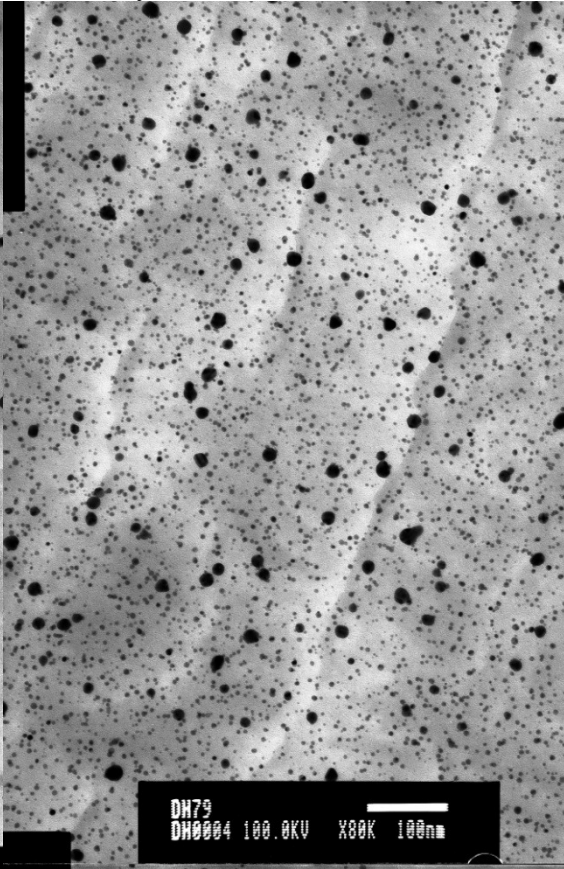

Entry 5

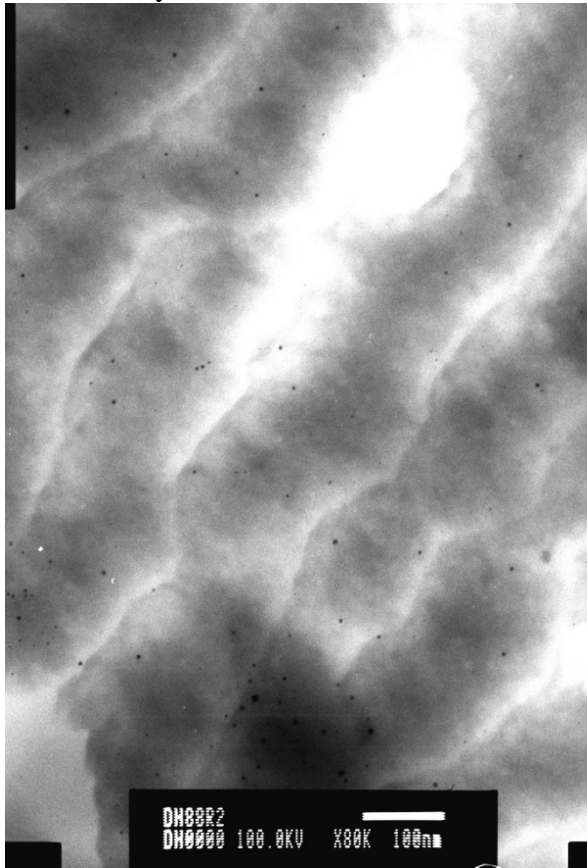

Entry 6

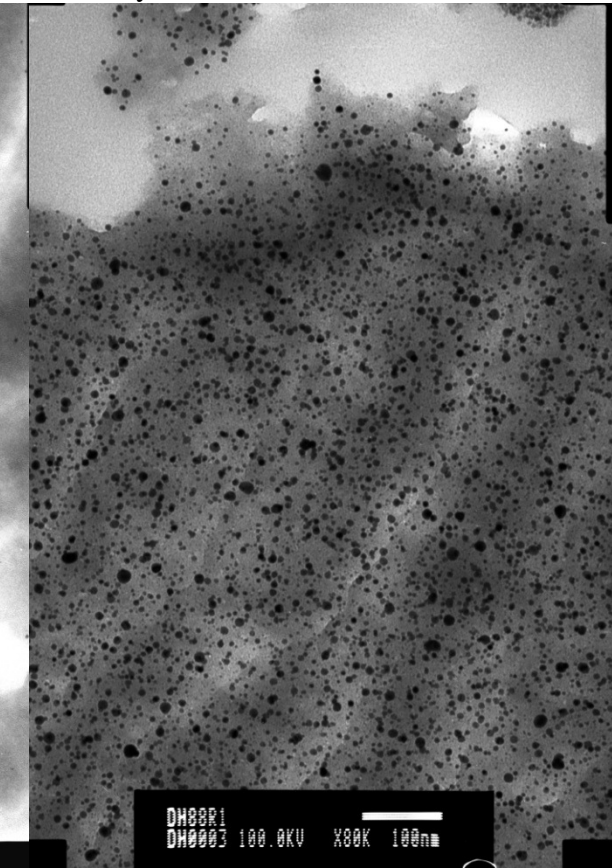



Entry 7

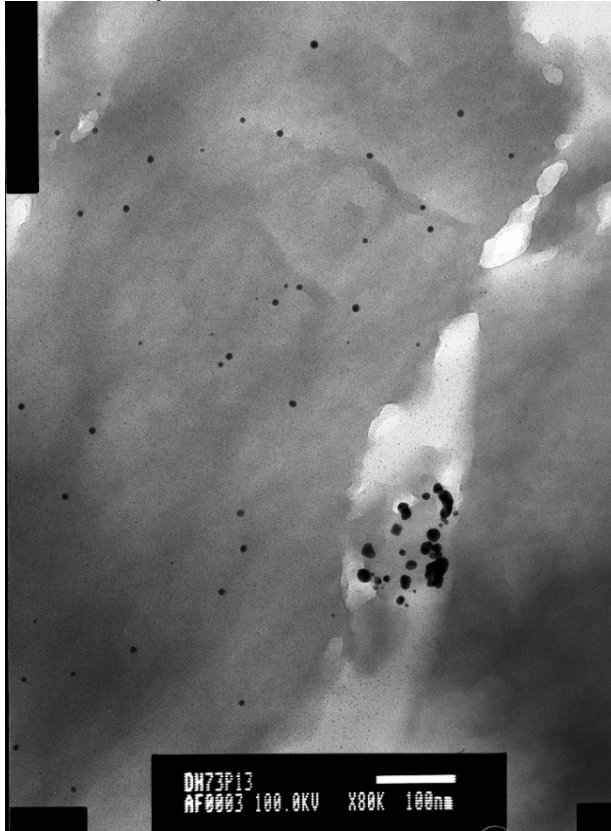

Entry 8

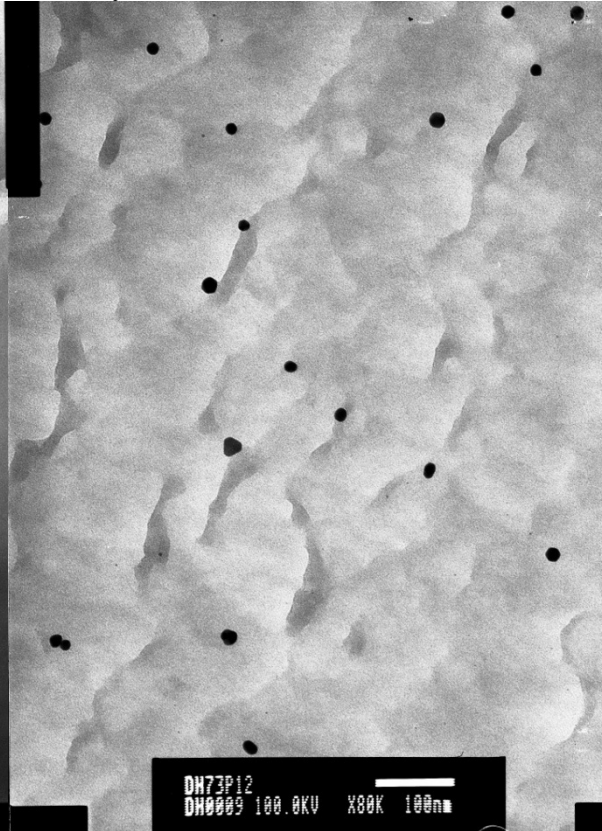

Transmission electronic microscopy corresponding to the table 2

SX entry 1

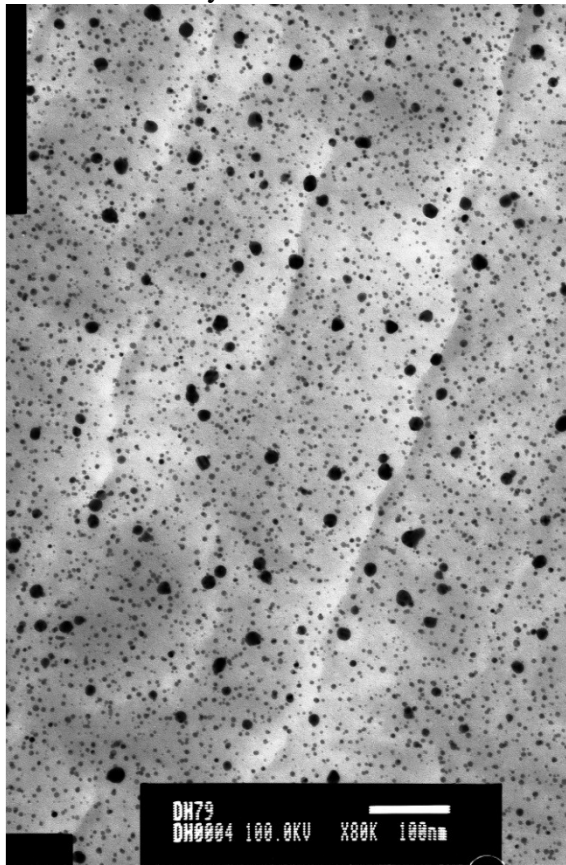

MX entry 2

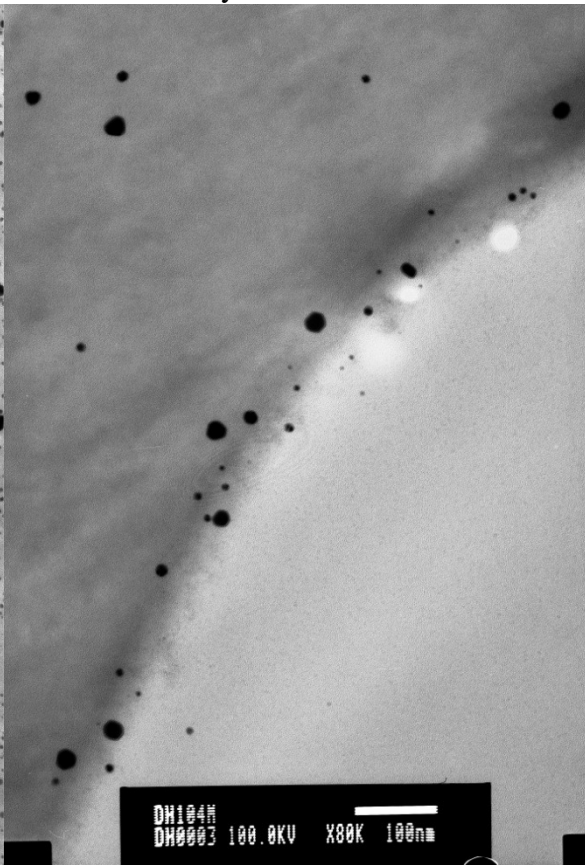

DX entry 3

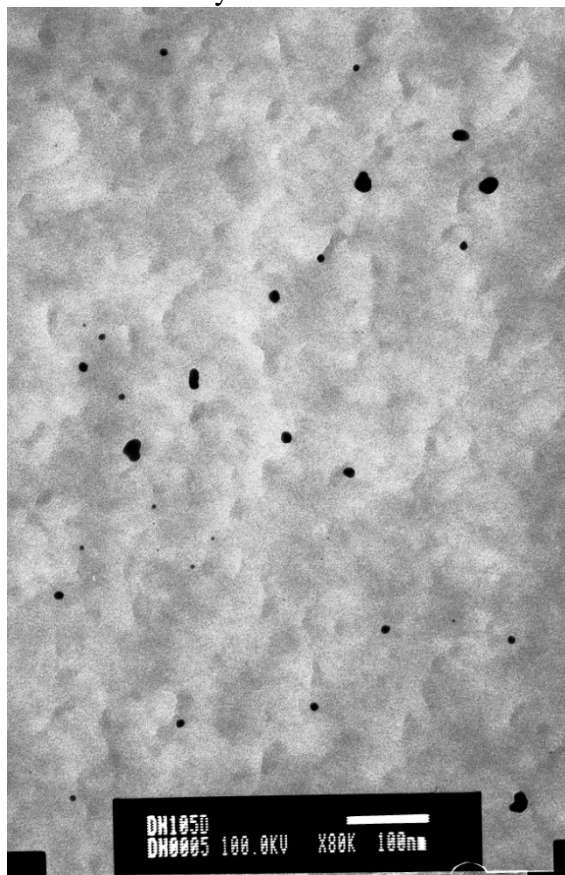

SY entry 4

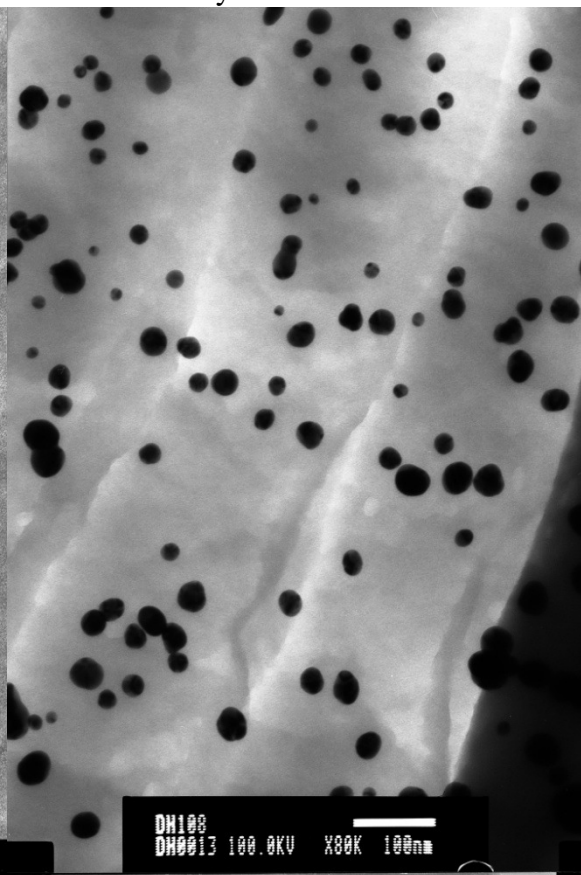

MY entry 5

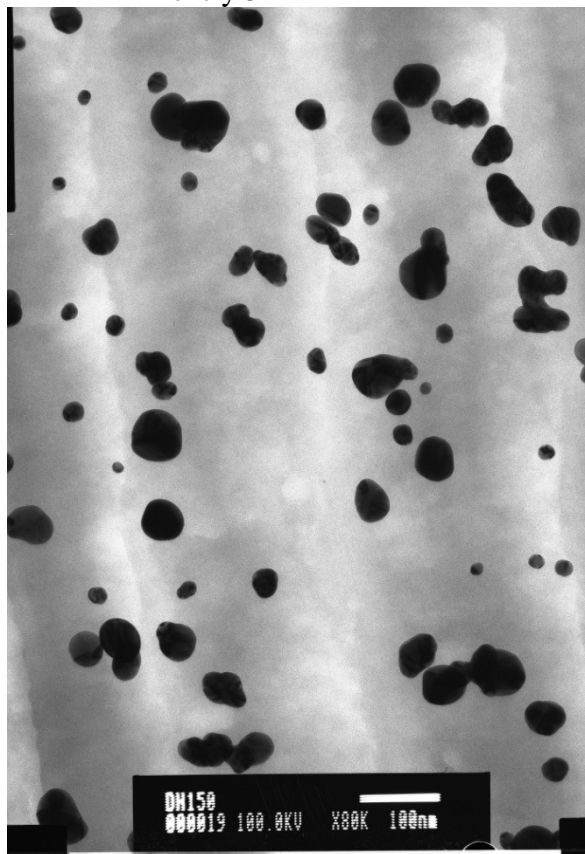

DY entry 6

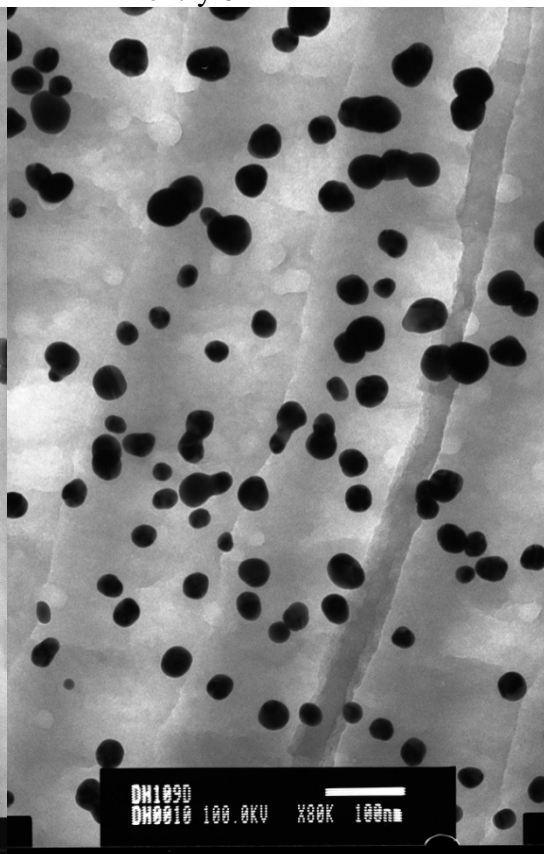

Supplement: mmc1 [file mmc1.pdf]
